# Supplementary material
Source: PubMed Central journal article supplement (PMC3326745)
Supplement: NIHMS335426-supplement-01.pdf [file NIHMS335426-supplement-01.pdf]

## **Supplementary material**

### **An activatable multimodal/multifunctional nanoprobe for direct imaging of intracellular drug delivery**

Rajendra N. Mitra<sup>a</sup>, Mona Doshi<sup>a</sup>, Xiaolei Zhang<sup>b,c</sup>, Jessica C. Tyus<sup>d</sup>, Niclas Bengtsson<sup>e</sup>, Steven Fletcher<sup>f</sup>, Brent D. G. Page<sup>f</sup>, James Turkson<sup>c</sup>, Andre J. Gesquiere<sup>a,d,g</sup>, Patrick T. Gunning<sup>f</sup>, Glenn A. Walter<sup>h</sup>, Swadeshmukul Santra<sup>a,b,d,\*</sup>

<sup>a</sup> NanoScience Technology Center, <sup>b</sup> Biomolecular Science Center, University of Central Florida 12424 Research Parkway, Suite 400, Orlando, FL 32826, USA.

<sup>c</sup> Burnett School of Biomedical Sciences, University of Central Florida College of Medicine, 6900 Lake Nona Boulevard, Orlando, FL 32827, USA.

<sup>d</sup> Department of Chemistry,  $\beta$ CREOL, The College of Optics and Photonics, and the, 12424 Research Parkway, Suite 400, Orlando, FL 32826, USA.

<sup>e</sup> Molecular Genetics and Microbiology, University of Florida, PO Box 100201, Gainesville, FL 32610, USA.

<sup>f</sup> Department of Chemistry, University of Toronto at Mississauga, Mississauga, ON, L5L 1C6, Canada.

<sup>g</sup> CREOL, The College of Optics & Photonics, University of Central Florida, P.O. Box 162700, Orlando, FL 32816, USA.

<sup>h</sup> Physiology and Functional Genomics, University of Florida, PO Box 100274, Gainesville, FL 32610, USA.

\*To whom all correspondence should be made. E. mail: [ssantra@mail.ucf.edu](mailto:ssantra@mail.ucf.edu)

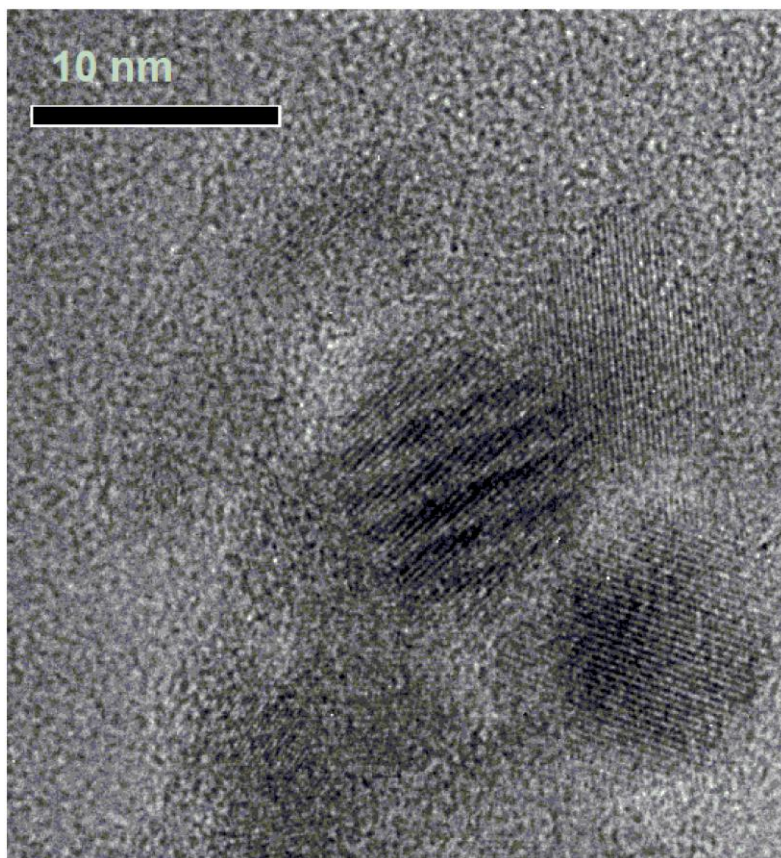

**Fig. S1.** High resolution TEM (HRTEM) image of a single MMCNP.

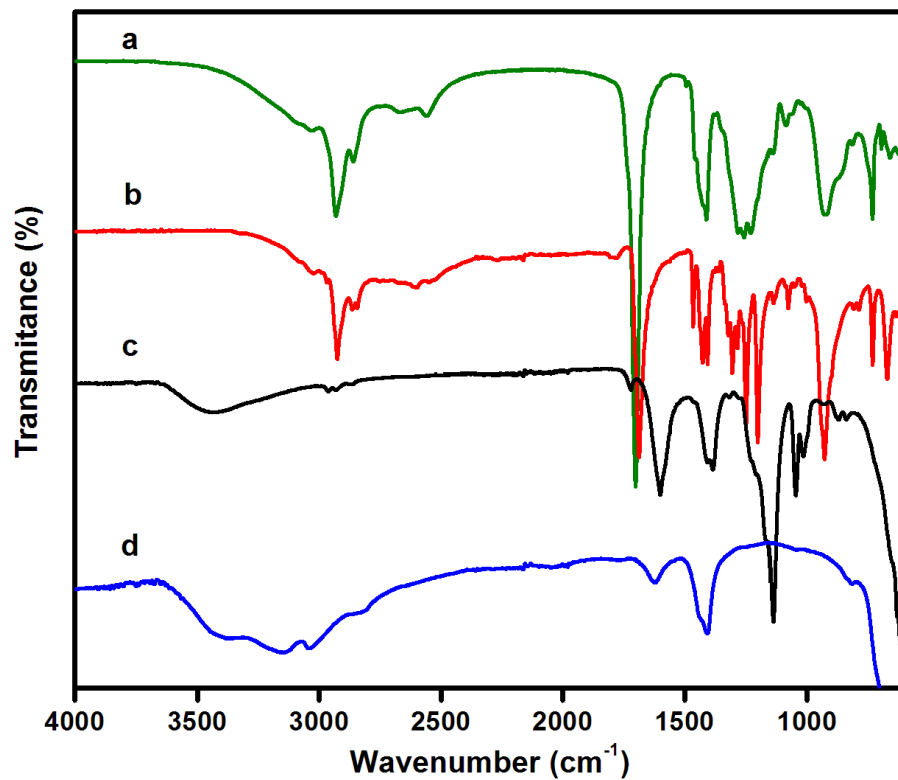

**Fig. S2.** FT-IR spectra of (a) dihydrolipoic acid, (b) lipoic acid, (c) dihydrolipoic acid coated IONPs, and (d) IONPs.

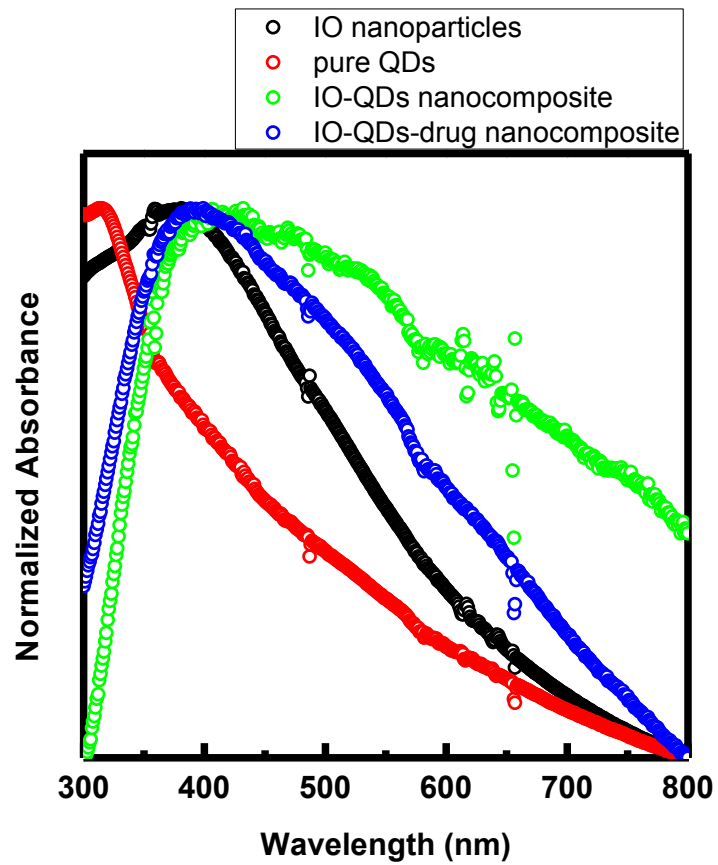

**Fig. S3(a).** Normalized UV-Vis absorbance spectra of pure Qdots (red), IONP (black), Qdots attached to IONP (green) and MMCNPs (blue).

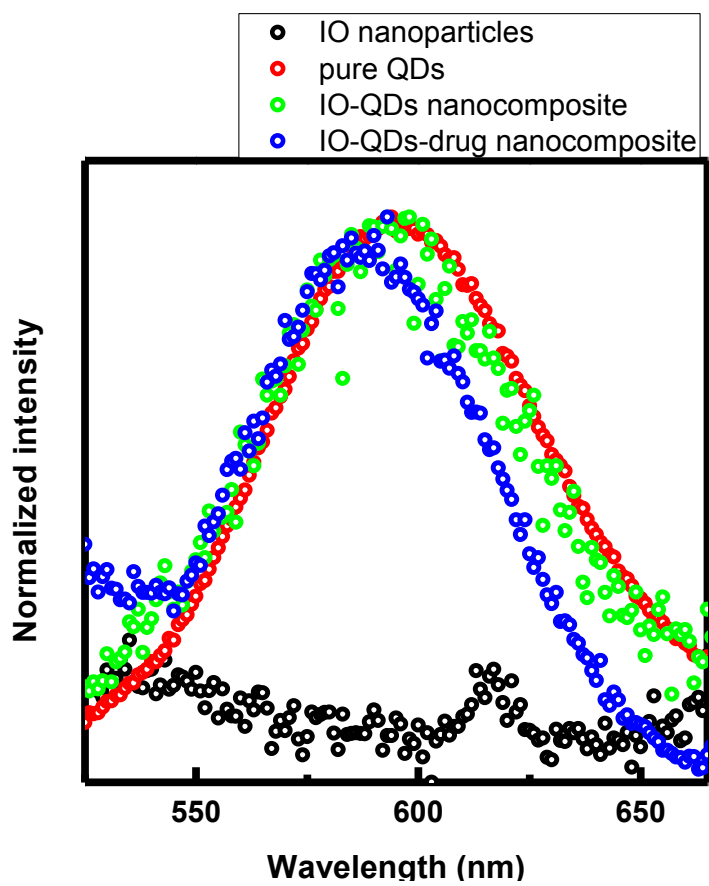

**Fig. S3(b).** Normalized emission spectra of pure Qdots (red), IONP (black), Qdots attached to IONP (green) and MMCNPs (blue).

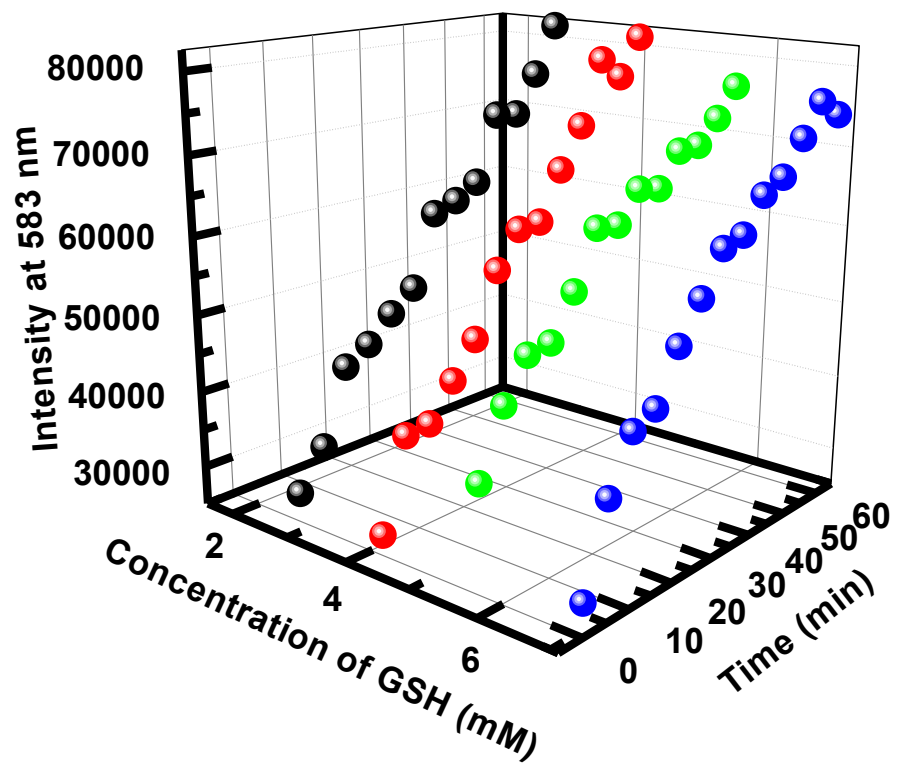

**Fig. S4.** 3D plots of the Qdot fluorescence intensity recovery from MMCNP (“OFF state”) as a function of time for GSH concentrations of 2.8, 4.2, 5.7, and 7.0 mM.

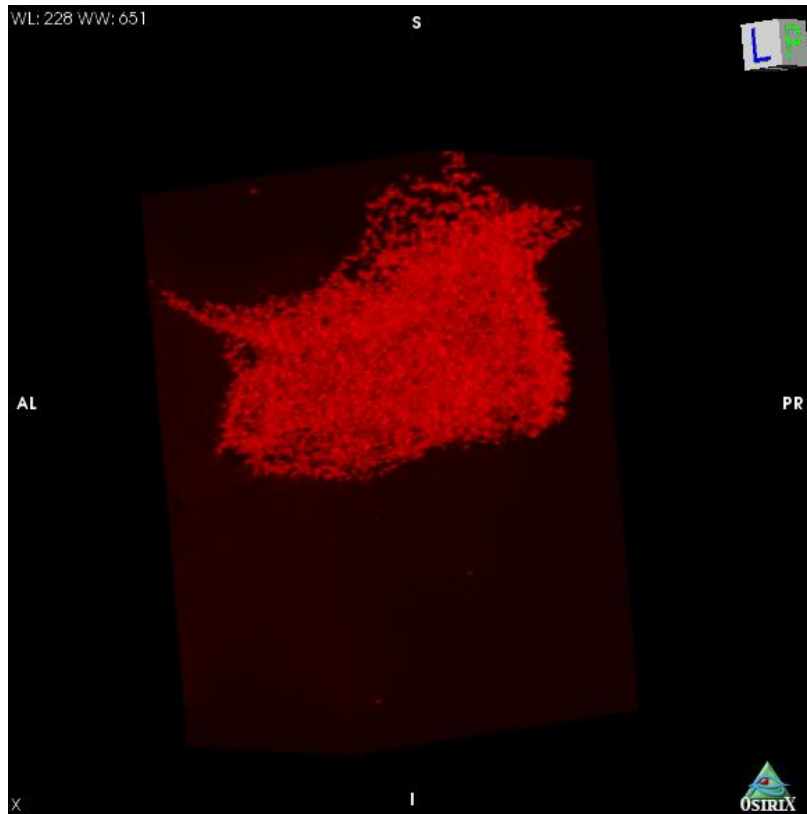

**Fig. S5.** A snapshot of a video showing 3D reconstruction of MRI images recorded on agar phantom.

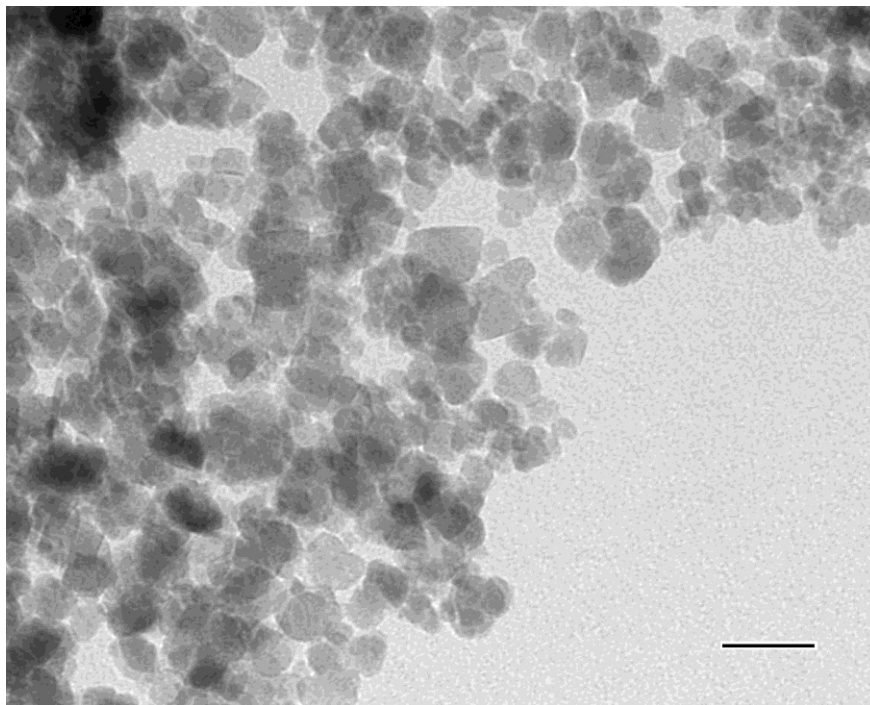

**Fig. S6.** TEM image of IONPs showing polydispersity, Bar = 20 nm.
